# Supplementary material for: Paternal Effect of the Nuclear Formin-like Protein MISFIT on Plasmodium Development in the Mosquito Vector
Source: PLoS Pathog. 2009 Aug 7;5(8):e1000539. doi: 10.1371/journal.ppat.1000539 (PMC2715856; doi:10.1371/journal.ppat.1000539)
Supplement: Figure S2 — Multiple sequence alignment of Plasmodium MISFIT proteins. Colored blocks indicate amino acid residues conserved among all species. The FH2 domain, a central conserved region and the DAD-like sequence (DAD′) are indicated. Alignment was performed by ClustalW and visualized by BioEdit Sequence Alignment Editor. (0.15 MB PDF) [file ppat.1000539.s009.pdf]

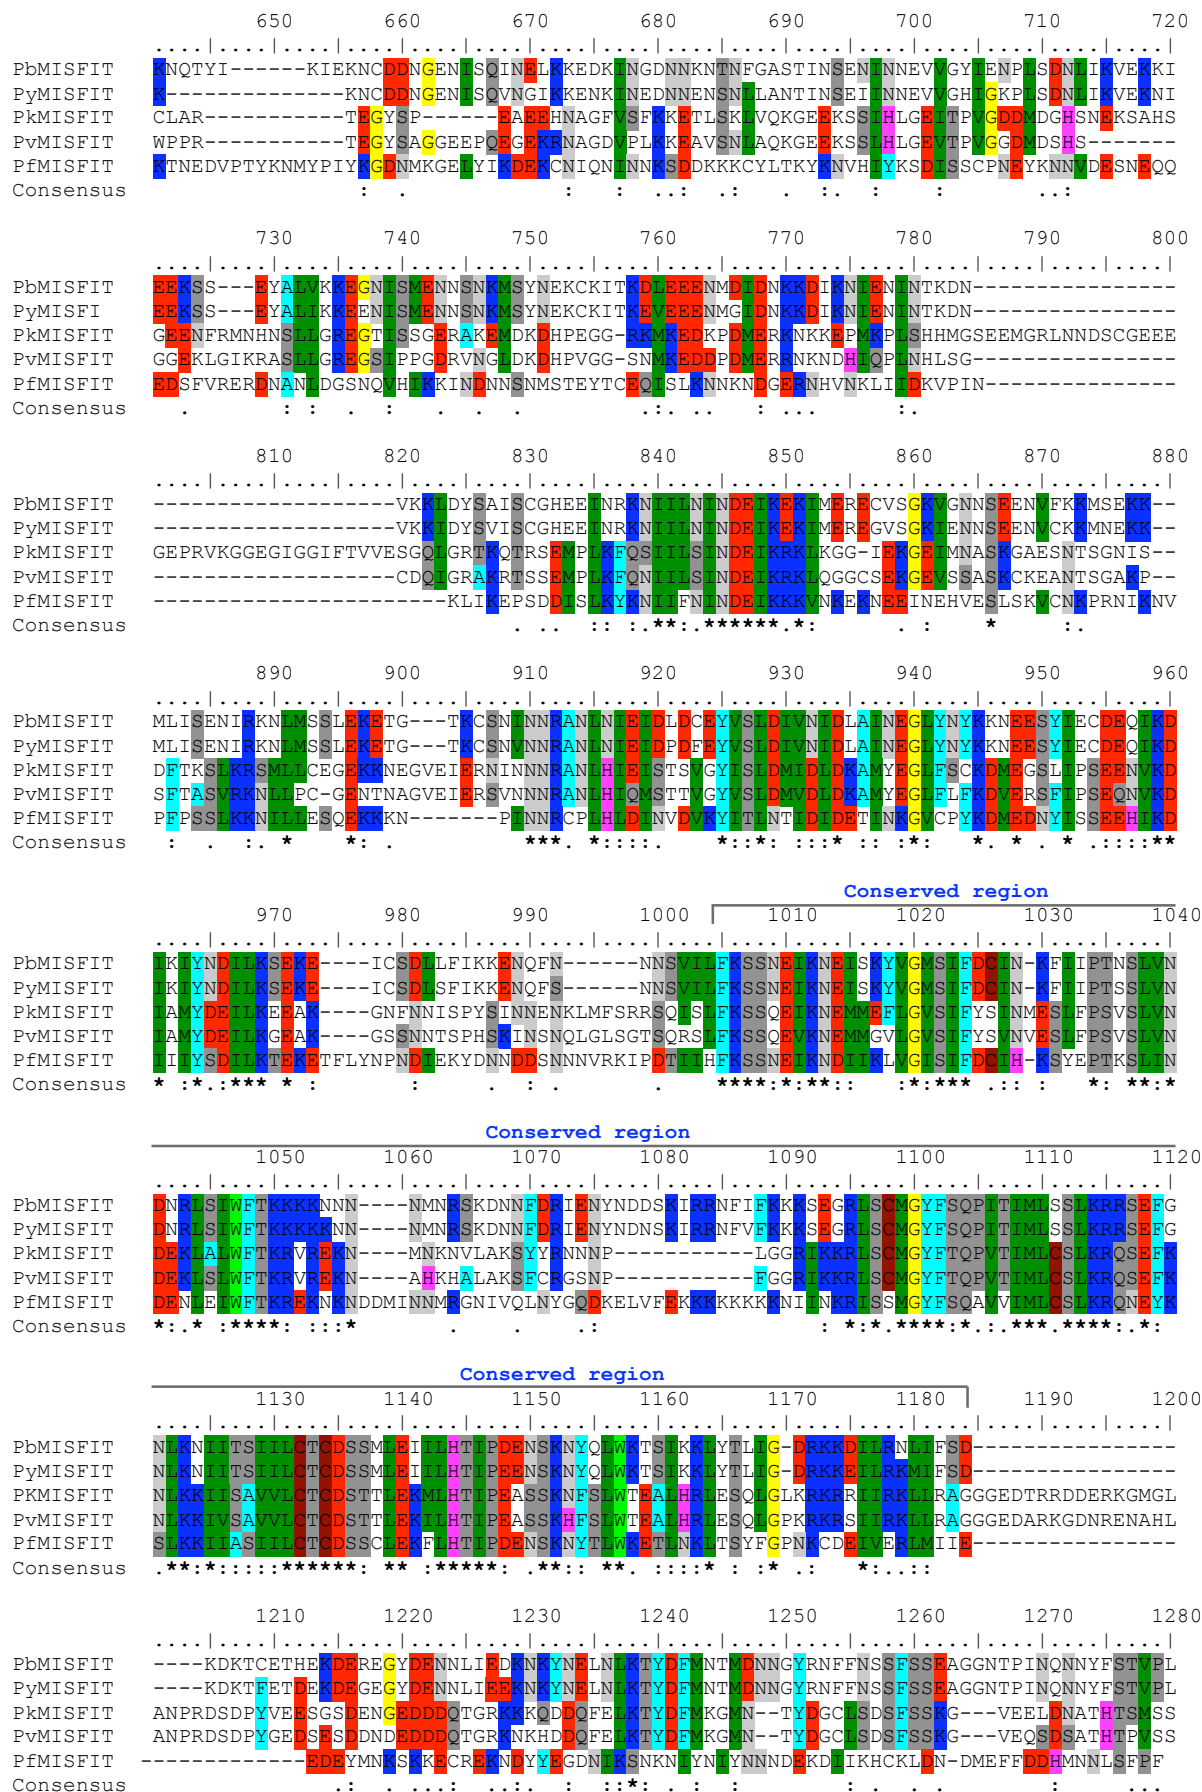

FH2-domain

|           |      |          |            |            |           |            |            |           |
|-----------|------|----------|------------|------------|-----------|------------|------------|-----------|
|           | 1290 | 1300     | 1310       | 1320       | 1330      | 1340       | 1350       | 1360      |
| PbMISFIT  | SKTD | KTEKYEGK | ENNINLEDEB | KFCFCT     | NDTHKRFQY | LLLIENYDFT | YSDLIKHT   | QNKNNIDLI |
| PyMISFIT  | SKAD | KTEKYEGK | ENNINLEDEB | KFCFCT     | NDTHKRFQY | LLLIENYDFT | YSDLIKHT   | QNKNNIDLI |
| PkMISFIT  | SRGT | IQEKQ--- | NEENFET    | YDEEFQCFCT | PNVHKRFQY | LLLIENYDFT | YSDLIKHT   | QNKNNIDLI |
| PvMISFIT  | SRGT | TREKQ--- | NEEHFET    | YDEEFQCFCT | PNVHKRFQY | LLLIENYDFT | YSDLIKHT   | QNKNNIDLI |
| PfMISFIT  | ECN  | EHNKKNY  | NDIQEED    | DETYEDBQ   | FCFCTCR   | KNVHKRFQY  | LLLIENYDFT | YSDLIKHT  |
| Consensus | .    | :*       | :*:        | :          | ***:***** | *          | ***        | **:*:*:*: |

FH2-domain

|           |                |        |         |       |        |                                         |         |        |
|-----------|----------------|--------|---------|-------|--------|-----------------------------------------|---------|--------|
|           | 1370           | 1380   | 1390    | 1400  | 1410   | 1420                                    | 1430    | 1440   |
| PbMISFIT  | FCNV           | IFLNLW | NEPKCFK | WQWND | FNKLYN | NGFL                                    | ENGKISR | ERCILL |
| PyMISFIT  | FCNV           | IFLNLW | NEPKCFK | WQWND | FNKLYN | NGFL                                    | ENGKISR | ERCILL |
| PkMISFIT  | FCNV           | IFLNLW | NEPKRYR | WQWDT | VVKVEM | HLGY                                    | LENGRIS | RDRCLM |
| PvMISFIT  | FCNV           | IFLNLW | NEPKRYR | WQWDT | VVKVEM | HLGY                                    | LENGRIS | RDRCLM |
| PfMISFIT  | FCNV           | IFLNLW | NEPKRYR | WQWDT | VVKVEM | HLGY                                    | LENGRIS | RDRCLM |
| Consensus | ***:***:*****: | *:     | :*:*:   | *     | :*     | ***:***:***:***:***:***:***:***:***:*** | ***     | :**    |

FH2-domain

|           |         |               |       |        |         |        |       |         |
|-----------|---------|---------------|-------|--------|---------|--------|-------|---------|
|           | 1450    | 1460          | 1470  | 1480   | 1490    | 1500   | 1510  | 1520    |
| PbMISFIT  | KSID    | FINCFEL       | KNQLE | TEEFKK | SCCIFS  | -ELE   | VGVEK | CSN     |
| PyMISFIT  | KSID    | FINCFEL       | KNQLE | TEEFKK | SCCIFS  | -ELE   | VGVEK | CSN     |
| PkMISFIT  | RSID    | FINSFEL       | IRGEM | GTSEF  | FARSCCV | GETTGE | NAEVE | MEETDEE |
| PvMISFIT  | RSID    | FINSFEL       | IRGEM | GTSEF  | FARSCCV | GETTGE | NAEVE | MEETDEE |
| PfMISFIT  | KCID    | FINCFEL       | KNQLE | TEEFKK | SCCIFS  | -ELE   | VGVEK | CSN     |
| Consensus | :.***** | :***:***:***: | *     | **     | ***:    | .      | .     | ..      |

FH2-domain

|           |         |                                          |                                         |                                         |                                         |                                         |                                         |                                         |
|-----------|---------|------------------------------------------|-----------------------------------------|-----------------------------------------|-----------------------------------------|-----------------------------------------|-----------------------------------------|-----------------------------------------|
|           | 1530    | 1540                                     | 1550                                    | 1560                                    | 1570                                    | 1580                                    | 1590                                    | 1600                                    |
| PbMISFIT  | LIKRY   | LIVMIW                                   | IGDVK                                   | PFYPL                                   | FSYDE                                   | -GKKIK                                  | YSED                                    | LFNLS                                   |
| PyMISFIT  | LIKRY   | LIVMIW                                   | IGDVK                                   | PFYPL                                   | FSYDE                                   | -GKKIK                                  | YSED                                    | LFNLS                                   |
| PkMISFIT  | LIKRY   | LIVMIW                                   | IGDVK                                   | PFYPL                                   | FSYDE                                   | -GKKIK                                  | YSED                                    | LFNLS                                   |
| PvMISFIT  | LIKRY   | LIVMIW                                   | IGDVK                                   | PFYPL                                   | FSYDE                                   | -GKKIK                                  | YSED                                    | LFNLS                                   |
| PfMISFIT  | LIKRY   | LIVMIW                                   | IGDVK                                   | PFYPL                                   | FSYDE                                   | -GKKIK                                  | YSED                                    | LFNLS                                   |
| Consensus | ***:*** | :***:***:***:***:***:***:***:***:***:*** | ***:***:***:***:***:***:***:***:***:*** | ***:***:***:***:***:***:***:***:***:*** | ***:***:***:***:***:***:***:***:***:*** | ***:***:***:***:***:***:***:***:***:*** | ***:***:***:***:***:***:***:***:***:*** | ***:***:***:***:***:***:***:***:***:*** |

DAD'

|           |      |       |        |        |        |       |        |       |
|-----------|------|-------|--------|--------|--------|-------|--------|-------|
|           | 1610 | 1620  | 1630   | 1640   | 1650   | 1660  | 1670   | 1680  |
| PbMISFIT  | NIA  | NNSD  | FIFSAD | YFEKNT | QKEANG | IANDS | NYTNFK | GNKNY |
| PyMISFIT  | NIA  | NNSD  | FIFSAD | YFEKNT | QKEANG | IANDS | NYTNFK | GNKNY |
| PkMISFIT  | RHA  | LDG   | -----  | GTSGC  | SFRP   | GFYS  | PTVD   | GASR  |
| PvMISFIT  | RHA  | LDG   | -----  | GTSGC  | SFRP   | GFYS  | PTVD   | GASR  |
| PfMISFIT  | NDI  | FCDIS | -----  | GTSGC  | SFRP   | GFYS  | PTVD   | GASR  |
| Consensus | .    | :     | :      | :      | :      | :     | :      | :     |

DAD'

|           |       |       |      |       |       |       |       |
|-----------|-------|-------|------|-------|-------|-------|-------|
|           | 1690  | 1700  | 1710 | 1720  | 1730  | 1740  | 1750  |
| PbMISFIT  | ISI   | NGNNV | KGMH | FMKNN | GNLKT | ENYEL | KHRKS |
| PyMISFIT  | ISI   | NGNNV | KGMH | FMKNN | GNLKT | ENYEL | KHRKS |
| PkMISFIT  | ----- | NYYG  | DSL  | FDSS  | KALNT | EVKKR | KSVE  |
| PvMISFIT  | GGR   | SDH   | GAVN | YGD   | PFGD  | SSKAL | NT    |
| PfMISFIT  | ----- | YDY   | TNNR | LRS   | QS    | YNAE  | TKRKS |
| Consensus | :     | :     | :    | :     | :     | :     | :     |
