# Supplementary material for: Paternal Effect of the Nuclear Formin-like Protein MISFIT on Plasmodium Development in the Mosquito Vector
Source: PubMed Central journal article supplement (PMC2715856; doi:10.1371/journal.ppat.1000539), 2009-08-07
Supplement: ppat.1000539.s003.pdf [file ppat.1000539.s003.pdf]

**Table S2.** Effect of *misfit* disruption on oocyst development.

| Time point                                                                  | Parasite         | Number of exp | Number of midguts | Prevalence (%) | Parasite intensity |       | Parasite range | Analysis of variance |         | Fold difference |
|-----------------------------------------------------------------------------|------------------|---------------|-------------------|----------------|--------------------|-------|----------------|----------------------|---------|-----------------|
|                                                                             |                  |               |                   |                | Arithmetic mean    | Gmean |                | P value              | F value |                 |
| <b><i>A. gambiae</i> infection</b>                                          |                  |               |                   |                |                    |       |                |                      |         |                 |
| Day 3                                                                       | <i>wt</i>        | 2             | 36                | 83.3           | 41.8               | 10.0  | 0-412          | <0.001               | 16.7    | 5.8             |
|                                                                             | <i>Δpbmisfit</i> |               |                   | 58.3           | 4.0                | 1.7   | 0-25           |                      |         |                 |
| Day 5                                                                       | <i>wt</i>        | 2             | 28                | 85.7           | 54.5               | 20.2  | 0-251          | <0.001               | 30.7    | 9.8             |
|                                                                             | <i>Δpbmisfit</i> |               |                   | 75.0           | 5.1*               | 2.0   | 0-74           |                      |         |                 |
| Day 10                                                                      | <i>wt</i>        | 2             | 63                | 94.0           | 52.0               | 22.2  | 0-309          | <0.001               | 126.2   | 18.9            |
|                                                                             | <i>Δpbmisfit</i> |               |                   | 47.6           | 3.4*               | 1.2   | 0-60           |                      |         |                 |
| Day 15                                                                      | <i>wt</i>        | 2             | 39                | 84.6           | 23.1               | 10.0  | 0-149          | <0.001               | 62.2    | 20.0            |
|                                                                             | <i>Δpbmisfit</i> |               |                   | 30.8           | 1.0*               | 0.5   | 0-6            |                      |         |                 |
| <b><i>A. stephensi</i> infection</b>                                        |                  |               |                   |                |                    |       |                |                      |         |                 |
| Day 3                                                                       | <i>wt</i>        | 2             | 27                | 96.3           | 377.8              | 290.7 | 0-580          | <0.001               | 32.5    | 5.3             |
|                                                                             | <i>Δpbmisfit</i> |               |                   | 92.6           | 117.3              | 54.6  | 0-400          |                      |         |                 |
| Day 5                                                                       | <i>wt</i>        | 2             | 32                | 96.9           | 304.0              | 194.5 | 0-620          | <0.001               | 17.6    | 4.4             |
|                                                                             | <i>Δpbmisfit</i> |               |                   | 93.8           | 77.6*              | 44.4  | 0-244          |                      |         |                 |
| Day 10                                                                      | <i>wt</i>        | 2             | 66                | 100            | 356.8              | 306.3 | 0-750          | <0.001               | 169.3   | 8.4             |
|                                                                             | <i>Δpbmisfit</i> |               |                   | 100            | 61.3*              | 36.4  | 0-344          |                      |         |                 |
| Day 15                                                                      | <i>wt</i>        | 2             | 41                | 100            | 318.6              | 243.2 | 0-670          | <0.001               | 254.4   | 33.9            |
|                                                                             | <i>Δpbmisfit</i> |               |                   | 100            | 12.9*              | 7.2   | 0-110          |                      |         |                 |
| <b><i>CTL4</i> kd <i>A. gambiae</i> infection (ookinete invasion assay)</b> |                  |               |                   |                |                    |       |                |                      |         |                 |
| Day 7                                                                       | <i>wt</i>        | 2             | 44                | 75             | 141.6              | 19.9  | 0-632          | 0.970                | 0.0     | No difference   |
|                                                                             | <i>Δpbmisfit</i> |               | 44                | 84.1           | 95.3               | 20.1  | 0-616          |                      |         |                 |

The table is divided into three datasets (separated by dotted lines) that report results from *Δpbmisfit* or Pbc507 *wt* parasite infections of *A. gambiae*, *A. stephensi*, and *A. gambiae CTL4* kd (for ookinete invasion assay), respectively. The first two datasets report numbers of oocysts and the third dataset reports numbers of melanized parasites. Equal numbers of *Δpbmisfit* or *wt* infected midguts (indicated in the second column) were pooled for each group. The total number of midguts is indicated in the third column. Prevalence shows the percentage of midguts with at least one oocyst or melanized parasite. The oocyst intensity data (average number of oocysts per midgut) were log-transformed [ $\log_{10}(n+1)$ ] to achieve a normal distribution. Midguts with zero parasites were also considered for calculation of the arithmetic and geometric (following data normalization) means of parasite densities (number per midgut). P and F one-way ANOVA values for each *Δpbmisfit* vs. *wt* infection were calculated using normalized intensities. In *CTL4* kd infections, the intensity data refers to the number of melanised ookinetes. Fold differences between *wt* and *Δpbmisfit* oocyst intensities were computed using the geometric means. Asterisks indicate small and non-sporulating *Δpbmisfit* oocysts.
