# Supplementary material for: Paternal Effect of the Nuclear Formin-like Protein MISFIT on Plasmodium Development in the Mosquito Vector
Source: PubMed Central journal article supplement (PMC2715856; doi:10.1371/journal.ppat.1000539), 2009-08-07
Supplement: ppat.1000539.s007.pdf [file ppat.1000539.s007.pdf]

**Table S6.** Primers for qRT-PCR, RT-PCR and generation of *pbmisfit* transgenic parasites

| Primer name                | Sequence (5' to 3')                           | Description                                   |
|----------------------------|-----------------------------------------------|-----------------------------------------------|
| <i>misfit</i> QRT-PCR F    | CAAATGATTTCGGAAATGTTGC                        |                                               |
| <i>misfit</i> QRT-PCR R    | CAATTTGCTATCATCGCCCT                          |                                               |
| <i>misfit</i> RT-PCR F     | GATGAAGAAAAGGACAAAGAAATTTTC                   |                                               |
| <i>misfit</i> RT-PCR R     | AAGGGATACATATTCACAATCAAG                      |                                               |
| <i>gfp</i> QRT-PCR F       | CCTGTCTCTTTTACCAGACAACCA                      |                                               |
| <i>gfp</i> QRT-PCR R       | GGTCTCTCTTTTTCGTTGGGATCT                      |                                               |
| <i>p28</i> RT-PCR F        | AATGCACAGGTACAGGAGAACTAAAT                    |                                               |
| <i>p28</i> RT-PCR R        | CACACTCATAATGTTTTCCAGTCAATT                   |                                               |
| <i>amal</i> RT-PCR F       | TATGGGTCCAAGATATTGTAGTAATAA                   |                                               |
| <i>amal</i> RT-PCR R       | GAATTAGCTTTACCATAAATATCTGC                    |                                               |
| <i>chit</i> RT-PCR F       | GCCCGCCAGATGTAATTATA                          |                                               |
| <i>chit</i> RT-PCR R       | TGCCAAATTCTACACCATCG                          |                                               |
| <i>ctrp</i> RT-PCR F       | AGAGAAGAAGATTGCCCAACAG                        |                                               |
| <i>ctrp</i> RT-PCR R       | ATCGGATCATTTCGATCGATAAC                       |                                               |
| <i>soap</i> RT-PCR F       | TCGAAGGAGCAAGGAAAAATTCC                       |                                               |
| <i>soap</i> RT-PCR R       | ATGAACAGCTACATTCTTCGGTC                       |                                               |
| <i>warp</i> RT-PCR F       | ATGAAGAGTGTTAAAAGGAATAACATATAT                |                                               |
| <i>warp</i> RT-PCR R       | CAGACGTCAGTGAAGAAGGATT                        |                                               |
| <i>maebl</i> RT-PCR F      | GAATTGAAGAAGCTAAGAAAGCAG                      |                                               |
| <i>maebl</i> RT-PCR R      | TTCTTCGTACCATCTTCCTCC                         |                                               |
| <i>misfit</i> A F          | <u>TTGGGCCCAAGATGATAGTAATTATAAAGAATTAGAAG</u> | Disruption upstream target (A) <i>Apal</i>    |
| <i>misfit</i> A R          | <u>CCAAGCTTGAACAATAACTGTTACTAGTGG</u>         | Disruption upstream target (A) <i>HindIII</i> |
| <i>misfit</i> B F          | <u>TGAATTCTTGTTCATATTTAGCAGTGAATTAG</u>       | Disruption downstream target (B) <i>EcoRI</i> |
| <i>misfit</i> B R          | <u>GGGGATCCGAATCAAATCTGCTTCATCCATG</u>        | Disruption downstream target (B) <i>BamHI</i> |
| <i>misfit</i> A INT F      | CATAAATTTTTACGATGAGGTA                        | 38 bp upstream of <i>misfit A</i>             |
| <i>misfit</i> WT R         | GCCTGATCAACATATGAATCATTG                      | 332 bp downstream of <i>misfit A</i>          |
| <i>tgdhfr-ts</i> 5'UTR R   | GATGTGTTATGTGATTAATTCATACAC                   | 200 bp into the 5'UTR of <i>tgdhfr-ts</i>     |
| <i>misfit-myc</i> F        | <u>GGGGTACCCAGAAGGAAGATTAAGTTGTATGG</u>       | Tagging 3' target <i>pbmisfit Apal</i>        |
| <i>misfit-myc</i> R        | <u>TTGGGCCCCAGCAGAAGAATCAAATTCCTGC</u>        | Tagging 3' target <i>pbmisfit KpnI</i>        |
| <i>Misfit-myc</i> Seq F(1) | CAACAGTTCACCTTTCAAAAACCTG                     | Sequencing (Tagging construct)                |
| <i>misfit-myc</i> Seq F(2) | TGGAAACAAACCTAATTACGAAGTT                     | Sequencing (Tagging construct)                |

Where appropriate, target restriction sites are shown as underlined italics and restriction site overhangs (to ensure efficient cutting) are in italics. The appropriate restriction enzyme is presented in the description column. F, forward; R, reverse. All primers are listed in a 5' to 3' direction.
