# Supplementary material for: Paternal Effect of the Nuclear Formin-like Protein MISFIT on Plasmodium Development in the Mosquito Vector
Source: PubMed Central journal article supplement (PMC2715856; doi:10.1371/journal.ppat.1000539), 2009-08-07

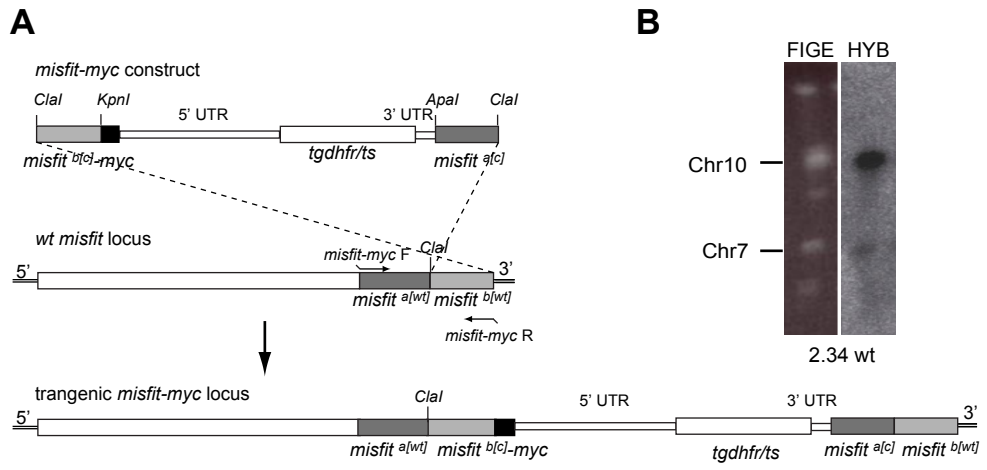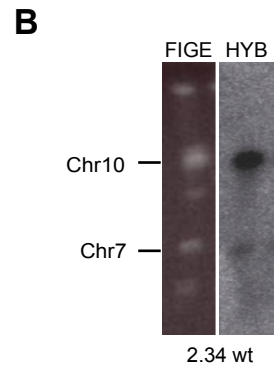

Supplement: ppat.1000539.s011.pdf [file ppat.1000539.s011.pdf]
